# Supplementary material for: The Price of Safety: The Evolution of Municipal Bond Insurance Value
Source: Atypon-hosted journal article supplement (doi:10.1287/mnsc.2023.4813), 2023-07-04
Supplement: mnsc.2023.4813.sm1.pdf [file mnsc.2023.4813.sm1.pdf]

Internet Appendix to  
The Price of Safety:  
The Evolution of Municipal Bond Insurance Value

Kimberly Cornaggia<sup>\*1</sup>, John Hund<sup>†2</sup>, and Giang Nguyen<sup>‡3</sup>

<sup>1,3</sup>Pennsylvania State University

<sup>2</sup>University of Georgia

October 25, 2022

---

\*Smeal College of Business, Pennsylvania State University. Email: kcornaggia@psu.edu

†Terry College of Business, University of Georgia. Email: jhund@uga.edu

‡Smeal College of Business, Pennsylvania State University. Email: giang.nguyen@psu.edu

## A.1 Non-parametric estimate of insurance value

The IPWRA method employed in Section 5.3 of the paper is doubly robust and unbiased given the well-specified outcome model. However, because the IPWRA method relies upon a parametric model to generate weights, we also use the non-parametric CEM method proposed by [Iacus et al. \(2011\)](#) and [Iacus et al. \(2012\)](#). CEM begins by generating a multi-dimensional grid of covariates to match upon, dividing each variable into bins (potentially of varying widths). As an illustrative example, employing only two covariates (maturity and issue size) and stratifying by deciles to create bins, we obtain a square divided into 100 smaller squares (“strata”), with the shortest maturity and smallest issue size bonds in the lower left strata and the longest maturity and largest issue size bonds in the upper right strata. Within each strata, we then compare insured and uninsured bonds, discarding all strata where there are either no insured bonds or uninsured bonds to ensure that all measures calculated have common support. The benefit of CEM is reducing imbalance and avoiding dependence on model specification. Because bond maturity and issue size are highly skewed, the non-parametric CEM helps to match well across all of the percentiles of the underlying distribution.

Implementation of CEM requires a choice of bin size. Very wide bins result in inefficient matching, whereas very narrow bins or including too many covariates result in discarding most of the sample since we require both insured and uninsured bonds within each strata. We restrict bonds to match on year and credit rating, ensuring that each strata includes only bonds which are “locally close” with respect to issue size and duration and exactly matched on credit rating and year. Matching exactly by state presents a “too many covariate” problem with respect to the consistency of estimation, so we match instead on terciles of tax privilege as calculated in [Babina et al. \(2021\)](#).

Table [A.5](#) report the results of our CEM estimation. Panel A shows the ATE based on the simple average of the difference in yields between insured and uninsured bonds across strata. Panel B shows the ATE based on the weighted mean effect which we calculate by regressing yields on the insurance dummy, bond characteristics, and macroeconomic variables to control for any intra-strata variation using the CEM weights (which are calculated for each observation based on the matches in its strata).

Panel A indicates significant gross insurance value only in the 2000–2008 period with a highly competitive Aaa insurance market. The gross value is insignificant in the earlier 1985–1999 period with Aaa insurance sold by a few large companies. We observe yield inversion (negative gross value to insurance) in the post-crisis 2009–2020 period when insurance no longer provides Aaa coverage. Results in Panel B support the same overall conclusion about the value of Aaa insurance (versus lower quality insurance) although (1) the gross value in the early 1985–1999 period is significantly positive, (2) the magnitude of yield inversion in 2009–2020 is much smaller than in Panel A, and (3) the gross value of insurance is positive for the full 36-year period (masking the time series variation). Taken together, the non-parametric estimates of insurance value in Table [A.5](#) reveal a large erosion of insurance value following the demise of the monolines compared to the selection-adjusted value estimates in Table 5.3.

## A.2 Transaction cost function estimation for full-panel analysis

The muni bond regression model is:

$$r_{ts} = c_0(Q_t - Q_s) + c_1(Q_t \frac{1}{S_t} - Q_s \frac{1}{S_s}) + c_2(Q_t \log S_t - Q_s \log S_s) + \beta_1 MKT_{ts} + \beta_2 TERM_{ts} + \gamma ND_{ts}(5\% - CP) + \eta_{ts}. \quad (\text{A.1})$$

In this regression,  $r_{ts}$  is the change in logged price of the bond from trade at time  $s$  to trade at time  $t$ .<sup>1</sup> The price of the bond is converted to the equivalent price had the bond had a 5% coupon rate.  $ND_{ts}$  is the number of days, expressed in fraction of years, between trade  $s$  and trade  $t$ .  $CP$  is the coupon rate of the bond.  $Q$  is the trade direction. It is equal to 1 for a buy customer trade, -1 for a sell customer trade, and 0 for an interdealer trade.<sup>2</sup>  $S$  is the size of the trade, expressed in \$1,000.  $MKT_{ts}$  is the overall municipal bond market return between trades  $s$  and  $t$ . This is computed as the logged change in BAML U.S. Municipal Bond Market Total Return Index between times  $s$  and  $t$ .  $TERM_{ts}$  is the difference in return between long-term and short-term municipal bonds between times  $s$  and  $t$ . The short-term municipal bond return is computed as the logged change in the BAML U.S. Municipal Bonds 1-3 Years Total Return Index. The long-term municipal bond return is computed similarly from BAML U.S. Municipal Bonds 12-22 Years Total Return Index.  $\eta_{ts}$  is the regression error term. With five parameters to estimate, the minimum requirement is that a bond has at least six trades. Even among these bonds with at least six trades, the model estimation is not always possible (for example, if all the trades in a bond are buyer-initiated). Thus, to obtain reliable estimates of transaction cost function, we require bonds to have at least 30 trades. These constraints reduce substantially the number of bonds for which transaction costs can be reliably estimated.

The return model is estimated by iterated weighted least squares, with the weight being the inverse of the variance of the error term given by:

$$\sigma_{ts}^2 = NS_{ts}\sigma_{Sessions}^2 + D_{ts}\sigma_{\delta}^2 + (2 - D_{ts})\sigma_{\kappa}^2, \quad (\text{A.2})$$

where  $NS_{ts}$  is the number of trading sessions (and fractions of trading sessions) between trades  $s$  and  $t$ ,  $\sigma_{Sessions}^2$  is the variance of the bond-specific valuation factor per trading session,  $D_{ts}$  is the number of interdealer trades in the trade pair  $s$  and  $t$  ( $D_{ts} = 0, 1, 2$ ),  $\sigma_{\delta}^2$  is the variance of the price concession in interdealer trades, and  $\sigma_{\kappa}^2$  is the variance of customer transaction cost not explained by the average transaction cost function. The variance of the error term is estimated from a pooled regression across all bonds for each market, and thus all bonds in each market have the same  $\sigma_{Sessions}^2$ ,  $\sigma_{\delta}^2$ , and  $\sigma_{\kappa}^2$ .

The estimation proceeds as follows. Starting with an initial guess for  $\sigma_{Sessions}^2$ ,  $\sigma_{\delta}^2$ , and  $\sigma_{\kappa}^2$ , we obtain an estimate for  $\sigma_{ts}^2$ . The inverse of  $\sigma_{ts}^2$  is then used as the weight for the regression

<sup>1</sup>If multiple trades occur in the same bond at the same time and with the same trade type, we aggregate them as one single trade with the price being the size-weighted average price.

<sup>2</sup>We note that MSRB records trade indicator type from dealers' perspective. That is, a "P" ("S") indicates a purchase (sale) by the dealer, which corresponds to a customer sell (buy) trade.

in equation (A.1) for each bond. From this step, we obtain the regression error term  $\eta_{ts}$ . In the next step, we pool all bonds and regress  $\eta_{ts}^2$  on  $NS_{ts}$ ,  $D_{ts}$ , and  $(2 - D_{ts})$  to obtain estimates of  $\sigma_{Sessions}^2$ ,  $\sigma_{\delta}^2$ , and  $\sigma_{\kappa}^2$ . This is a constrained regression as the estimated variances have to be non-negative. The process continues until convergence (we use the improvement in the log likelihood score of the model to determine convergence status).

After the model estimation, the transaction cost as a function of trade size  $S$  for each bond in the sample is

$$\hat{c}(S) = c_0 + c_1 \frac{1}{S} + c_2 \log S.$$

The transaction cost estimated here is interpreted as the half-spread. It reflects the increase in price if a customer wants to buy, or the decrease in price if a customer wants to sell. A higher transaction cost indicates a low level of liquidity, and vice versa.

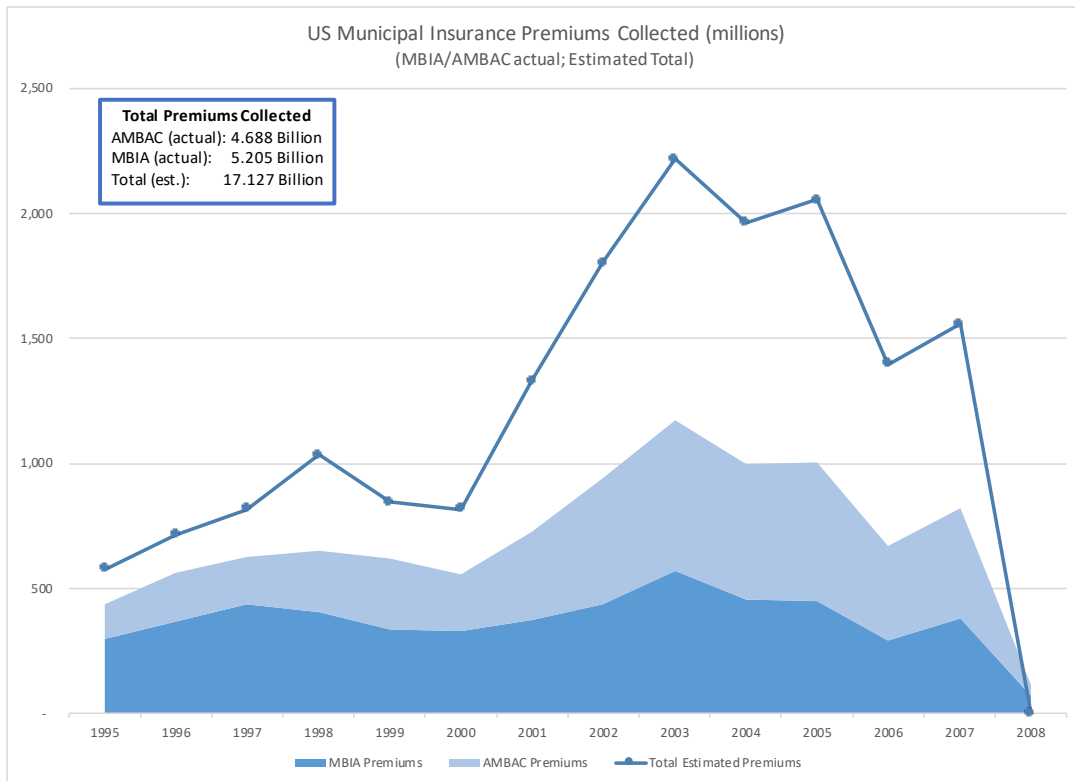

**Figure A.1:** Premiums Collected by MBIA, AMBAC, and Estimated Total Market

We calculate premiums with data from 10-K filings by public insurers MBIA and AMBAC. Between 1994 and 2008, these two insurers collected \$10.2 billion dollars in gross premiums written on global public finance in the US. We then estimate premiums for other insurers based on the average premium charged by MBIA and AMBAC and the relative market share of each insurer. In 2020, Assured Guaranty collected \$294 million dollars in gross premiums.

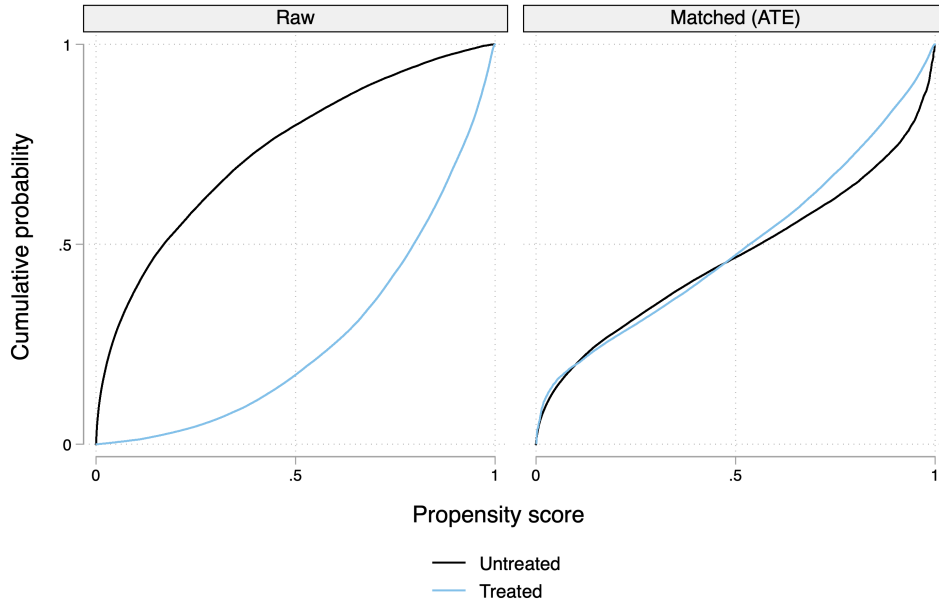

(a) Cumulative Empirical Distributions of Propensity Scores

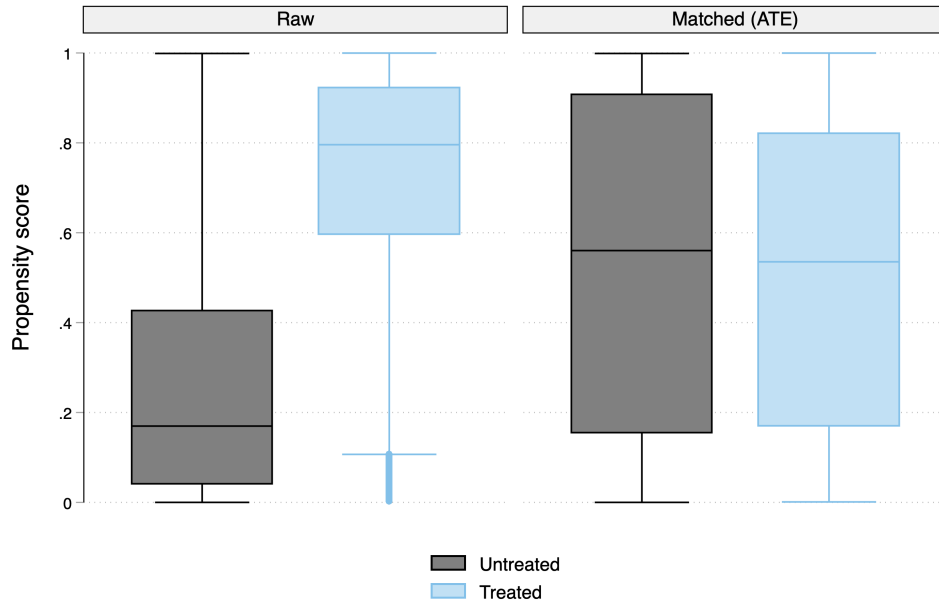

(b) Box-Plot of Matched and Unmatched Propensity Score Distributions

**Figure A.2:** Improvements in Matching from Applying IPW Weights

This figure plots the changes in the propensity score distribution from the weighting procedure in the IPWRA estimation in Section 5. The top panel plots the cumulative empirical kernel-smoothed distribution for the matched and unmatched sample, and the lower panel plots medians and percentiles of the same distribution.

**Table A.1:** Subsample analysis of offering yields by rating and insurance status for GO bonds

The table compares offering yields of insured and uninsured bonds by underlying credit rating class for GO bonds over three subsample periods covering 1985–2020. The “Rating” column shows the underlying rating at the time of bond issuance. The “Diff.” column shows the difference in each variable as insured minus uninsured. \* $p < 0.1$ ; \*\* $p < 0.05$ ; \*\*\* $p < 0.01$ .

| <i>A. 1985–1999</i> |               |      |                 |      |          |        |
|---------------------|---------------|------|-----------------|------|----------|--------|
| Rating              | Insured Bonds |      | Uninsured Bonds |      | Diff.    | t-stat |
|                     | Nobs          | Mean | Nobs            | Mean |          |        |
| Aaa                 | 1             | 4.95 | 7115            | 4.95 | 0.00     | 0.21   |
| Aa                  | 3256          | 4.86 | 32049           | 5.03 | −0.18*** | −13.79 |
| A                   | 45289         | 5.03 | 29104           | 5.31 | −0.28*** | −38.26 |
| Baa                 | 17097         | 5.19 | 12010           | 5.59 | −0.40*** | −32.90 |
| Ba and below        | 207           | 5.06 | 376             | 5.53 | −0.48*** | −6.55  |
| Nonrated            | 38266         | 5.05 | 48754           | 5.26 | −0.21*** | −30.67 |

  

| <i>B. 2000–2008</i> |               |      |                 |      |          |        |
|---------------------|---------------|------|-----------------|------|----------|--------|
| Rating              | Insured Bonds |      | Uninsured Bonds |      | Diff.    | t-stat |
|                     | Nobs          | Mean | Nobs            | Mean |          |        |
| Aaa                 | 463           | 3.87 | 13345           | 3.82 | 0.06     | 1.64   |
| Aa                  | 40967         | 3.87 | 38183           | 3.91 | −0.04*** | −6.55  |
| A                   | 90439         | 3.88 | 22847           | 3.99 | −0.11*** | −16.36 |
| Baa                 | 19134         | 4.00 | 6217            | 4.10 | −0.10*** | −7.26  |
| Ba and below        | 87            | 4.59 | 47              | 4.34 | 0.25     | 1.28   |
| Nonrated            | 42319         | 4.04 | 71806           | 4.13 | −0.09*** | −16.02 |

  

| <i>C. 2009–2020</i> |               |      |                 |      |          |        |
|---------------------|---------------|------|-----------------|------|----------|--------|
| Rating              | Insured Bonds |      | Uninsured Bonds |      | Diff.    | t-stat |
|                     | Nobs          | Mean | Nobs            | Mean |          |        |
| Aaa                 | 0             | N.A. | 20181           | 2.14 | N.A.     | N.A.   |
| Aa                  | 2524          | 2.83 | 83905           | 2.30 | 0.53***  | 24.21  |
| A                   | 34753         | 2.67 | 19860           | 2.42 | 0.25***  | 27.27  |
| Baa                 | 12572         | 2.89 | 1528            | 3.23 | −0.34*** | −10.17 |
| Ba and below        | 5             | 3.43 | 75              | 3.31 | 0.12     | 0.52   |
| Nonrated            | 4652          | 2.34 | 123454          | 2.34 | −0.0004  | −0.03  |

**Table A.2:** Subsample analysis of offering yields by rating and insurance status for Revenue bonds

The table compares offering yields of insured and uninsured bonds by underlying credit rating class for Revenue bonds over three subsample periods covering 1985–2020. The “Rating” column shows the underlying rating at the time of bond issuance. The “Diff.” column shows the difference in each variable as insured minus uninsured.  $*p < 0.1$ ;  $**p < 0.05$ ;  $***p < 0.01$ .

| <i>A. 1985–1999</i> |               |      |                 |      |          |        |
|---------------------|---------------|------|-----------------|------|----------|--------|
| Rating              | Insured Bonds |      | Uninsured Bonds |      | Diff.    | t-stat |
|                     | Nobs          | Mean | Nobs            | Mean |          |        |
| Aaa                 | 33            | 4.70 | 1620            | 4.96 | −0.27*   | -1.87  |
| Aa                  | 1793          | 4.91 | 9369            | 5.27 | −0.36*** | -19.28 |
| A                   | 16931         | 5.10 | 12301           | 5.59 | −0.49*** | -38.93 |
| Baa                 | 5211          | 5.28 | 4432            | 5.55 | −0.27*** | -13.41 |
| Ba and below        | 3             | 5.52 | 16              | 5.52 | -0.00    | -0.00  |
| Nonrated            | 22895         | 5.18 | 31463           | 5.63 | −0.45*** | -47.70 |

  

| <i>B. 2000–2008</i> |               |      |                 |      |          |        |
|---------------------|---------------|------|-----------------|------|----------|--------|
| Rating              | Insured Bonds |      | Uninsured Bonds |      | Diff.    | t-stat |
|                     | Nobs          | Mean | Nobs            | Mean |          |        |
| Aaa                 | 35            | 4.26 | 3883            | 3.91 | 0.35***  | 5.35   |
| Aa                  | 14643         | 4.00 | 12257           | 4.06 | −0.06*** | -5.70  |
| A                   | 34846         | 4.01 | 5080            | 4.17 | −0.16*** | -11.54 |
| Baa                 | 3904          | 4.18 | 1132            | 4.47 | −0.29*** | -7.66  |
| Ba and below        | 5             | 4.63 | 6               | 7.34 | −2.70*** | -7.00  |
| Nonrated            | 14483         | 4.04 | 23018           | 4.47 | −0.43*** | -40.90 |

  

| <i>C. 2009–2020</i> |               |      |                 |      |          |        |
|---------------------|---------------|------|-----------------|------|----------|--------|
| Rating              | Insured Bonds |      | Uninsured Bonds |      | Diff.    | t-stat |
|                     | Nobs          | Mean | Nobs            | Mean |          |        |
| Aaa                 | 0             | N.A. | 2999            | 2.40 | N.A.     | N.A.   |
| Aa                  | 1082          | 2.91 | 31072           | 2.57 | 0.34***  | 10.11  |
| A                   | 8786          | 2.87 | 10743           | 2.90 | −0.03**  | -2.09  |
| Baa                 | 946           | 3.11 | 658             | 3.68 | −0.56*** | -9.13  |
| Ba and below        | 4             | 2.93 | 16              | 6.07 | −3.14*** | -8.59  |
| Nonrated            | 1087          | 2.51 | 33114           | 2.69 | −0.19*** | -5.71  |

**Table A.3:** Marginal Effects of the Choice to Insure: GO + REV Bonds

This table reports the marginal effects from the probit selection model specified in Equation (5) of the paper. Each coefficient represents the percentage increase in the probability of insurance from a unit change in the corresponding variable. The table also reports the percentage of insured and uninsured bonds correctly classified by the model.  $*p < 0.1$ ;  $**p < 0.05$ ;  $***p < 0.01$ .

| Variable                      | 1985–2020 | Subsample Analysis |           |           |
|-------------------------------|-----------|--------------------|-----------|-----------|
|                               |           | 1985–1999          | 2000–2008 | 2009–2020 |
| <b>Ratings</b>                |           |                    |           |           |
| Ba2 rated                     | -0.198*   | -0.163             | 0.000     | 0.000     |
| Ba1 rated                     | 0.057**   | 0.020              | 0.016     | 0.101**   |
| Baa2 rated                    | 0.028*    | 0.047*             | 0.001     | 0.126***  |
| Baa1 rated                    | 0.036***  | 0.077***           | 0.003     | 0.080***  |
| A3 rated                      | -0.013    | 0.045*             | -0.023*   | 0.025     |
| A2 rated                      | 0.039***  | 0.085***           | 0.021*    | 0.045***  |
| (A1 rating base)              | 0.000     | 0.000              | 0.000     | 0.000     |
| Aa3 rated                     | -0.274*** | -0.337***          | -0.143*** | -0.367*** |
| Aa2 rated                     | -0.416*** | -0.448***          | -0.302*** | -0.456*** |
| Aa1 rated                     | -0.517*** | -0.510***          | -0.512*** | -0.480*** |
| Credit Enhancement            | -0.162*** | -0.233***          | -0.052*** | -0.211*** |
| Duration                      | 0.011***  | 0.013***           | 0.016***  | -0.000    |
| Duration <sup>2</sup>         | -0.000*** | -0.000**           | -0.001*** | 0.000     |
| LN(Issue Amount)              | 0.001     | 0.034***           | -0.005    | -0.027*** |
| Num. of Agents                | -0.008*** | -0.011***          | -0.007*** | -0.006*** |
| Neg. Offering (Y/N)           | -0.036*** | 0.007              | -0.015    | 0.006     |
| Call Dummy (Y/N)              | 0.006*    | -0.017**           | 0.005     | 0.009***  |
| GO Dummy (Y/N)                | 0.029**   | 0.034              | -0.017    | 0.027     |
| <b>Use of Proceeds</b>        |           |                    |           |           |
| General Purposes              | -0.007    | 0.009              | 0.004     | -0.019*   |
| Higher Education              | -0.001    | 0.025              | 0.003     | 0.011     |
| K-12 Education                | 0.003     | 0.050              | -0.022    | 0.061***  |
| Water and Sewer               | 0.128***  | 0.052**            | 0.118***  | 0.057***  |
| <b>Previous Insurance</b>     |           |                    |           |           |
| Top Tercile Habit             | 0.141***  | 0.163***           | 0.180***  | 0.045***  |
| Underwriter Intensity Dummies | Yes       | Yes                | Yes       | Yes       |
| State and Year Effects        | Yes       | Yes                | Yes       | Yes       |
| Observations                  | 619,851   | 163,474            | 253,801   | 198,542   |
| Pseudo R2                     | 39.26     | 33.67              | 26.63     | 64.36     |
| % Insured Correct             | 82.20     | 77.98              | 89.97     | 86.27     |
| % UnInsured Correct           | 78.94     | 78.20              | 52.79     | 93.96     |

**Table A.4:** Inverse Probability Weighted Regressions: GO + REV Bonds

This table reports estimates of insurance value (in percentage points) from empirical model specified in Equation (6) of the paper. Negative values of the average treatment effect (ATE) indicate that insured bonds have lower yields than comparable (control) uninsured bonds. Standard errors of the ATE estimates are in parentheses. Panel A shows results for the dependent variable being the offering yield reported in Mergent. Panel B shows results for the dependent variable being the primary market yield. This market yield is calculated by averaging the yields on customer buys in the primary market, weighted by trade size. Trade data are from MSRB and only available from 2005 onward.  $*p < 0.1$ ;  $**p < 0.05$ ;  $***p < 0.01$ .

**Panel A: Inverse-Probability Weighted Regression Model: Offering Yields**

| ATE                   | 1985–2020          | 1985–1999            | 2000–2008            | 2009–2020        |
|-----------------------|--------------------|----------------------|----------------------|------------------|
| Uninsured             | 6.642              | 9.057                | 6.872                | 4.453            |
| Insured               | 6.619              | 8.978                | 6.710                | 4.495            |
| Avg. Treatment Effect | -0.023*<br>(0.010) | -0.079***<br>(0.017) | -0.162***<br>(0.012) | 0.041<br>(0.047) |
| Observations          | 620,059            | 163,682              | 253,819              | 202,558          |

**Panel B: Inverse-Probability Weighted Regression Model: Market Yields**

|                       | 2005–2020        | 1985–1999            | 2005–2008            | 2009–2020        |
|-----------------------|------------------|----------------------|----------------------|------------------|
| Uninsured             | 5.059            | 6.462                | 6.462                | 4.395            |
| Insured               | 5.089            | 6.307                | 6.307                | 4.411            |
| Avg. Treatment Effect | 0.030<br>(0.016) | -0.155***<br>(0.014) | -0.155***<br>(0.014) | 0.016<br>(0.049) |
| Observations          | 288,170          | 95,662               | 95,662               | 192,508          |

**Table A.5:** Average Value of Insurance GO Bonds: Non-Parametric Selection Models

This table reports estimates of insurance value (in percentage points) using Coarsened Exact Matching methodology to control for the selection into insurance non-parametrically. Negative values of the average treatment effect (ATE) indicate that insured bonds have lower yields than comparable (control) uninsured bonds. t-statistics of the ATE estimates are in parentheses. We balance the sample by placing insured and uninsured bonds in strata which match exactly on year, credit rating and terciles of tax privilege (as in Babina et al., 2021), and are locally close with respect to duration and issue size. Only strata with both insured and uninsured bonds are included, ensuring common support in the sample. Panel A shows the Average Treatment Effect (ATE) as the simple weighted average of the difference in yields between matched insured and uninsured bonds across strata. Panel B shows the ATE estimated from a weighted regression controlling for macroeconomic variables, residual credit rating and year effects, and other determinants from Equation (6) of the paper.  $*p < 0.1$ ;  $**p < 0.05$ ;  $***p < 0.01$ .

| <b>Panel A: Coarsened Exact Matching (Simple Average ATE)</b>   |                       |                      |                       |                     |
|-----------------------------------------------------------------|-----------------------|----------------------|-----------------------|---------------------|
|                                                                 | 1985–2019             | 1985–1999            | 2000–2008             | 2009–2020           |
| Uninsured                                                       | 6.839                 | 8.894                | 6.691                 | 4.406               |
| Insured                                                         | 6.838                 | 8.880                | 6.612                 | 4.676               |
| Avg. Treatment Effect                                           | -0.001<br>(-0.12)     | -0.014<br>(-1.25)    | -0.080***<br>(-6.15)  | 0.270***<br>(11.46) |
| Observations                                                    | 373,747               | 108,501              | 191,344               | 74,117              |
| <b>Panel B: Coarsened Exact Matching (Regression-Based ATE)</b> |                       |                      |                       |                     |
|                                                                 | 1985–2019             | 1985–1999            | 2000–2008             | 2009–2020           |
| Uninsured                                                       | 6.859                 | 8.911                | 6.708                 | 4.444               |
| Insured                                                         | 6.811                 | 8.857                | 6.599                 | 4.577               |
| Avg. Treatment Effect                                           | -0.049***<br>(-11.08) | -0.054***<br>(-6.34) | -0.108***<br>(-19.57) | 0.133***<br>(12.74) |
| Observations                                                    | 373,504               | 108,279              | 191,323               | 74,117              |

**Table A.6:** Inverse Probability Weighted Regressions: Additional Robustness Panels

All panels report estimates of insurance value (in percentage points) from the base empirical model specified in Section 5.1 of the paper but augmented in various ways. Standard errors of the ATE estimates are in parentheses. In Panel A, estimation weights are adjusted to achieve covariate entropy balance as in [Hainmueller \(2012\)](#) for all rating and proceeds dummies, issue size, duration, number of agents, and call, bank qualified, negotiated deal, additional credit enhancement, and prior insurance use dummies. Panel B extends the estimation to the additional 693 non-investment grade GO issued bonds in our sample period. Panel C includes all macro controls in both the outcome and selection equations. Panel D includes issuer fixed effects in the outcome equation (in addition to year fixed effects and both year and state fixed effects in the selection equation). Panel E includes county and year fixed effects in both the outcome and selection equations. Panel F includes county economic controls (in addition to year and state fixed effects) in both the outcome and selection equations.  $*p < 0.1$ ;  $**p < 0.05$ ;  $***p < 0.01$ .

**Panel A: Offering Yields with Entropy Balancing Weights**

| ATE                   | Full Sample      | Oligopoly Aaa       | Competitive Aaa      | No Aaa            |
|-----------------------|------------------|---------------------|----------------------|-------------------|
| Uninsured             | 6.540            | 8.992               | 6.817                | 4.398             |
| Insured               | 6.555            | 8.954               | 6.681                | 4.339             |
| Avg. Treatment Effect | 0.015<br>(0.012) | -0.038**<br>(0.019) | -0.137***<br>(0.013) | -0.059<br>(0.041) |
| Observations          | 456,637          | 117,338             | 187,482              | 151,817           |

**Panel B: Offering Yields Including Junk Bonds**

| ATE                   | Full Sample      | Oligopoly Aaa        | Competitive Aaa      | No Aaa            |
|-----------------------|------------------|----------------------|----------------------|-------------------|
| Uninsured             | 6.549            | 8.994                | 6.820                | 4.407             |
| Insured               | 6.561            | 8.944                | 6.681                | 4.401             |
| Avg. Treatment Effect | 0.012<br>(0.012) | -0.050***<br>(0.018) | -0.138***<br>(0.013) | -0.006<br>(0.061) |
| Observations          | 457,330          | 117,865              | 187,569              | 151,896           |

**Panel C: Offering Yields with Macro Variables in the Selection Equation**

| ATE                   | Full Sample      | Oligopoly Aaa        | Competitive Aaa      | No Aaa           |
|-----------------------|------------------|----------------------|----------------------|------------------|
| Uninsured             | 6.545            | 8.992                | 6.819                | 4.395            |
| Insured               | 6.559            | 8.944                | 6.681                | 4.397            |
| Avg. Treatment Effect | 0.013<br>(0.012) | -0.048***<br>(0.018) | -0.137***<br>(0.013) | 0.001<br>(0.059) |
| Observations          | 456,637          | 117,338              | 187,482              | 151,817          |

*continued on next page*

Table A.6: Inverse Probability Weighted Regressions: Additional Robustness Panels (Continued)

| <b>Panel D: Offering Yields with Issuer Fixed Effects in Outcome Equation</b> |                      |                  |                      |                   |
|-------------------------------------------------------------------------------|----------------------|------------------|----------------------|-------------------|
| ATE                                                                           | Full Sample          | Oligopoly Aaa    | Competitive Aaa      | No Aaa            |
| Uninsured                                                                     | 6.755                | 8.955            | 6.774                | 3.900             |
| Insured                                                                       | 6.729                | 8.967            | 6.706                | 3.874             |
| Avg. Treatment Effect                                                         | -0.026***<br>(0.011) | 0.012<br>(0.021) | -0.068***<br>(0.014) | -0.026<br>(0.049) |
| Observations                                                                  | 455,684              | 116,904          | 187,446              | 145,956           |

| <b>Panel E: Offering Yields with County Fixed Effects in Both Equations</b> |                  |                    |                      |                     |
|-----------------------------------------------------------------------------|------------------|--------------------|----------------------|---------------------|
| ATE                                                                         | Full Sample      | Oligopoly Aaa      | Competitive Aaa      | No Aaa              |
| Uninsured                                                                   | 6.497            | 8.888              | 6.753                | 4.493               |
| Insured                                                                     | 6.519            | 8.863              | 6.622                | 4.655               |
| Avg. Treatment Effect                                                       | 0.022<br>(0.011) | -0.025*<br>(0.015) | -0.131***<br>(0.013) | 0.163***<br>(0.042) |
| Observations                                                                | 454,610          | 117,221            | 187,256              | 150,133             |

| <b>Panel F: Offering Yields with County Economic Controls in Both Equations</b> |                  |                   |                      |                  |
|---------------------------------------------------------------------------------|------------------|-------------------|----------------------|------------------|
| ATE                                                                             | Full Sample      | Oligopoly Aaa     | Competitive Aaa      | No Aaa           |
| Uninsured                                                                       | 6.392            | 8.732             | 6.754                | 4.338            |
| Insured                                                                         | 6.404            | 8.716             | 6.616                | 4.366            |
| Avg. Treatment Effect                                                           | 0.012<br>(0.013) | -0.016<br>(0.021) | -0.138***<br>(0.013) | 0.029<br>(0.059) |
| Observations                                                                    | 443,759          | 107,209           | 186,675              | 149,875          |

**Table A.7: Insurance and Secondary Market Liquidity by Rating**

The table compares the average liquidity of insured and uninsured bonds, along with tests for significant differences between them. Observations are at the CUSIP-month level. *Bid-ask spread* is the difference between the weighted average customer buy price and customer sell price (weighted by trade size), expressed in bps of the average price. *Interquartile range* is the interquartile range of customer transaction prices on a given day, expressed in bps of the average price. Both *Bid-ask spread* and *Interquartile range* are computed for each day, then averaged across the month. *Amihud* measure is the absolute price change (in bps) per each \$1,000 of trading volume, averaged over each month. *Price impact* is the coefficient from the regression of price changes (in bps) on signed square root of trade size (positive for customer buys and negative for customer sells), estimated separately for each month. *% days without trade* is the percent of trading days in a month without a trade. Secondary market data are from the MSRB and cover the 2005–2020 period. The “Diff.” column shows the two-sided t-test statistic on equality of liquidity of insured and uninsured bonds. \* $p < 0.1$ ; \*\* $p < 0.05$ ; \*\*\* $p < 0.01$ .

|                                 | GO Bonds |       |        |           |           |        | Revenue Bonds |        |       |           |      |        |
|---------------------------------|----------|-------|--------|-----------|-----------|--------|---------------|--------|-------|-----------|------|--------|
|                                 | Insured  |       |        | Uninsured |           |        | Insured       |        |       | Uninsured |      |        |
|                                 | Nobs     | Mean  | Diff.  | Nobs      | Mean      | t-stat | Nobs          | Mean   | Diff. | Nobs      | Mean | t-stat |
| <i>Panel A: Aaa-rated Bonds</i> |          |       |        |           |           |        |               |        |       |           |      |        |
| Bid-ask spread (bps)            | 1534     | 56.57 | 94431  | 38.55     | 11.63***  | 595    | 80.07         | 34553  | 38.79 | 17.32***  |      |        |
| Interquartile Range (bps)       | 827      | 70.74 | 69749  | 55.85     | 5.59***   | 498    | 96.27         | 22162  | 60.66 | 9.24***   |      |        |
| Amihud measure (bps)            | 3964     | 9.19  | 252970 | 6.01      | 10.98***  | 1313   | 8.83          | 83489  | 6.32  | 7.05***   |      |        |
| Price impact (bps)              | 1906     | 18.19 | 131604 | 13.18     | 8.07***   | 879    | 19.28         | 43874  | 12.80 | 7.57***   |      |        |
| % days without trade            | 4012     | 88.61 | 256670 | 89.13     | -3.79***  | 1320   | 82.21         | 84390  | 88.65 | -14.79*** |      |        |
| <i>Panel B: Aa-rated bonds</i>  |          |       |        |           |           |        |               |        |       |           |      |        |
| Bid-ask spread (bps)            | 124422   | 53.40 | 295638 | 42.14     | 65.38***  | 86675  | 62.42         | 212119 | 43.92 | 81.95***  |      |        |
| Interquartile Range (bps)       | 67114    | 68.90 | 257819 | 62.58     | 20.75***  | 53538  | 83.14         | 182715 | 66.71 | 41.27***  |      |        |
| Amihud measure (bps)            | 348019   | 8.50  | 821979 | 6.04      | 82.00***  | 212326 | 9.18          | 532148 | 6.28  | 74.46***  |      |        |
| Price impact (bps)              | 149845   | 16.90 | 447212 | 13.84     | 39.50***  | 110045 | 18.49         | 314707 | 14.00 | 49.11***  |      |        |
| % days without trade            | 353858   | 89.25 | 835436 | 88.82     | 24.39***  | 214702 | 86.88         | 537744 | 87.57 | -23.70*** |      |        |
| <i>Panel C: A-rated bonds</i>   |          |       |        |           |           |        |               |        |       |           |      |        |
| Bid-ask spread (bps)            | 177211   | 60.19 | 80938  | 61.46     | -5.55***  | 174076 | 71.99         | 88184  | 61.45 | 42.95***  |      |        |
| Interquartile Range (bps)       | 115675   | 72.75 | 63891  | 79.26     | -18.14*** | 119300 | 90.10         | 86520  | 81.15 | 24.98***  |      |        |
| Amihud measure (bps)            | 583883   | 9.67  | 217346 | 7.96      | 42.87***  | 453254 | 10.76         | 211514 | 7.75  | 66.86***  |      |        |
| Price impact (bps)              | 234034   | 19.97 | 113912 | 17.23     | 27.30***  | 231564 | 21.83         | 136353 | 16.94 | 50.88***  |      |        |
| % days without trade            | 598899   | 90.25 | 221678 | 87.42     | 105.13*** | 459821 | 86.94         | 213642 | 85.14 | 49.99***  |      |        |

*continued on next page*

Table A.7: Insurance and Secondary Market Liquidity by Rating (Continued)

|                                  | GO Bonds |       |        |           |        |           | Revenue Bonds |        |        |           |          |        |
|----------------------------------|----------|-------|--------|-----------|--------|-----------|---------------|--------|--------|-----------|----------|--------|
|                                  | Insured  |       |        | Uninsured |        |           | Insured       |        |        | Uninsured |          |        |
|                                  | Nobs     | Mean  | Diff.  | Nobs      | Mean   | t-stat    | Nobs          | Mean   | Diff.  | Nobs      | Mean     | t-stat |
| <i>Panel D: Baa-rated Bonds</i>  |          |       |        |           |        |           |               |        |        |           |          |        |
| Bid-ask spread (bps)             | 33011    | 66.38 | 16317  | 71.59     | 80.14  | -8.91***  | 25183         | 80.14  | 11114  | 74.95     | 6.27***  |        |
| Interquartile Range (bps)        | 25345    | 82.33 | 11867  | 101.44    | 104.70 | -19.96*** | 18306         | 104.70 | 8799   | 109.47    | -3.50*** |        |
| Amihud measure (bps)             | 104775   | 10.14 | 37003  | 10.13     | 12.28  | 0.08      | 59201         | 12.28  | 23439  | 11.96     | 1.24     |        |
| Price impact (bps)               | 45465    | 20.73 | 19914  | 18.38     | 23.15  | 9.30***   | 33354         | 23.15  | 14450  | 19.25     | 10.14*** |        |
| % days without trade             | 107976   | 89.58 | 37864  | 84.22     | 84.71  | 63.25***  | 59953         | 84.71  | 23729  | 82.41     | 17.25*** |        |
| <i>Panel E: High-yield bonds</i> |          |       |        |           |        |           |               |        |        |           |          |        |
| Bid-ask spread (bps)             | 993      | 51.63 | 263    | 56.73     | 117.24 | -1.17     | 85            | 117.24 | 75     | 56.34     | 4.55***  |        |
| Interquartile Range (bps)        | 720      | 77.85 | 174    | 101.46    | 137.38 | -3.29***  | 48            | 137.38 | 53     | 88.99     | 1.99**   |        |
| Amihud measure (bps)             | 2235     | 6.79  | 502    | 7.06      | 35.12  | -0.53     | 176           | 35.12  | 160    | 6.86      | 6.50***  |        |
| Price impact (bps)               | 1369     | 15.82 | 275    | 14.93     | 59.26  | 0.53      | 100           | 59.26  | 77     | 11.19     | 5.41***  |        |
| % days without trade             | 2255     | 85.57 | 516    | 81.97     | 88.30  | 3.42***   | 177           | 88.30  | 163    | 91.69     | -4.94*** |        |
| <i>Panel F: Non-rated bonds</i>  |          |       |        |           |        |           |               |        |        |           |          |        |
| Bid-ask spread (bps)             | 41290    | 59.73 | 99619  | 50.05     | 75.30  | 31.22***  | 40865         | 75.30  | 92192  | 58.02     | 43.98*** |        |
| Interquartile Range (bps)        | 18756    | 69.44 | 94404  | 63.52     | 96.93  | 9.74***   | 21942         | 96.93  | 77653  | 74.77     | 28.33*** |        |
| Amihud measure (bps)             | 131268   | 11.22 | 324547 | 7.67      | 14.59  | 47.16***  | 113013        | 14.59  | 239080 | 10.60     | 36.18*** |        |
| Price impact (bps)               | 41577    | 21.06 | 151439 | 16.79     | 25.95  | 23.60***  | 48508         | 25.95  | 129517 | 17.61     | 43.07*** |        |
| % days without trade             | 136055   | 91.04 | 336908 | 90.73     | 88.41  | 15.09***  | 115429        | 88.41  | 243914 | 88.39     | 0.78     |        |

continued from previous page

**Table A.8:** Inverse Probability Weighted Regressions on Transaction Costs

These tables presents estimates of the liquidity value of insurance, using the full IPWRA methodology detailed in Equations (5) and (6) in Section 5.1 of the paper, but replacing the dependent variable in those equations with the estimated half-spread transaction cost estimated as in [Harris and Piwowar \(2006\)](#) and detailed above. Transaction cost functions are estimated using MSRB trade data from 2005-2019 for bonds issued after 2005 and having at least 30 trades. Errors are clustered at the issuer-level and *t*-statistics are presented in parentheses below the estimates.

| <b>IPWRA: Transaction Costs for \$20,000 trade size</b> |             |               |                 |         |
|---------------------------------------------------------|-------------|---------------|-----------------|---------|
| ATE                                                     | Full Sample | Oligopoly Aaa | Competitive Aaa | No Aaa  |
| Uninsured                                               | 84.975      |               | 89.752          | 84.609  |
| Insured                                                 | 86.413      |               | 88.941          | 86.222  |
| Avg. Treatment Effect                                   | 1.438       |               | -0.811          | 1.612   |
|                                                         | (1.289)     |               | (-0.420)        | (0.616) |
| Observations                                            | 17,249      |               | 8,042           | 9,207   |

  

| <b>IPWRA: Transaction Costs for \$50,000 trade size</b> |             |               |                 |         |
|---------------------------------------------------------|-------------|---------------|-----------------|---------|
| ATE                                                     | Full Sample | Oligopoly Aaa | Competitive Aaa | No Aaa  |
| Uninsured                                               | 79.295      |               | 83.837          | 80.219  |
| Insured                                                 | 80.873      |               | 82.550          | 80.894  |
| Avg. Treatment Effect                                   | 1.578       |               | -1.286          | 0.674   |
|                                                         | (1.457)     |               | (-0.688)        | (0.266) |
| Observations                                            | 17,249      |               | 8,042           | 9,207   |

  

| <b>IPWRA: Transaction Costs for \$100,000 trade size</b> |             |               |                 |         |
|----------------------------------------------------------|-------------|---------------|-----------------|---------|
| ATE                                                      | Full Sample | Oligopoly Aaa | Competitive Aaa | No Aaa  |
| Uninsured                                                | 73.438      |               | 77.535          | 75.388  |
| Insured                                                  | 75.262      |               | 76.216          | 77.645  |
| Avg. Treatment Effect                                    | 1.824       |               | -1.319          | 2.257   |
|                                                          | (1.337)     |               | (-0.719)        | (0.710) |
| Observations                                             | 17,249      |               | 8,042           | 9,207   |

## References

- Babina, Tania, Chotibhak Jotikasthira, Christian Lundblad, and Tarun Ramadorai, 2021, Heterogeneous taxes and limited risk sharing: Evidence from municipal bonds, *The Review of Financial Studies* 34, 509–568.
- Hainmueller, Jens, 2012, Entropy balancing for causal effects: A multivariate reweighting method to produce balanced samples in observational studies, *Political Analysis* 20, 25–46.
- Harris, Lawrence E., and Michael S. Piwowar, 2006, Secondary trading costs in the municipal bond market, *Journal of Finance* 61, 1361–1397.
- Iacus, Stefano M., Gary King, and Giuseppe Porro, 2011, Multivariate matching methods that are monotonic imbalance bounding, *Journal of the American Statistical Association* 106, 345–361.
- Iacus, Stefano M., Gary King, and Giuseppe Porro, 2012, Causal inference without balance checking: Coarsened Exact Matching, *Political Analysis* 20, 1–24.
